# Supplementary material for: Modification of the chiral selectivity of d-glucose oxidase and l-lactate oxidase in a collagen matrix
Source: Royal Society of Chemistry journal article supplement (doi:10.1039/c003933k), 2010-01-01

Figure 1: CD obtained from (a) stepwise addition of GOx to collagen, (b) titration of D-glucose to Collagen/GOx (1:5) system, and (c) titration of L-glucose to Collagen/GOx (1:5) system.

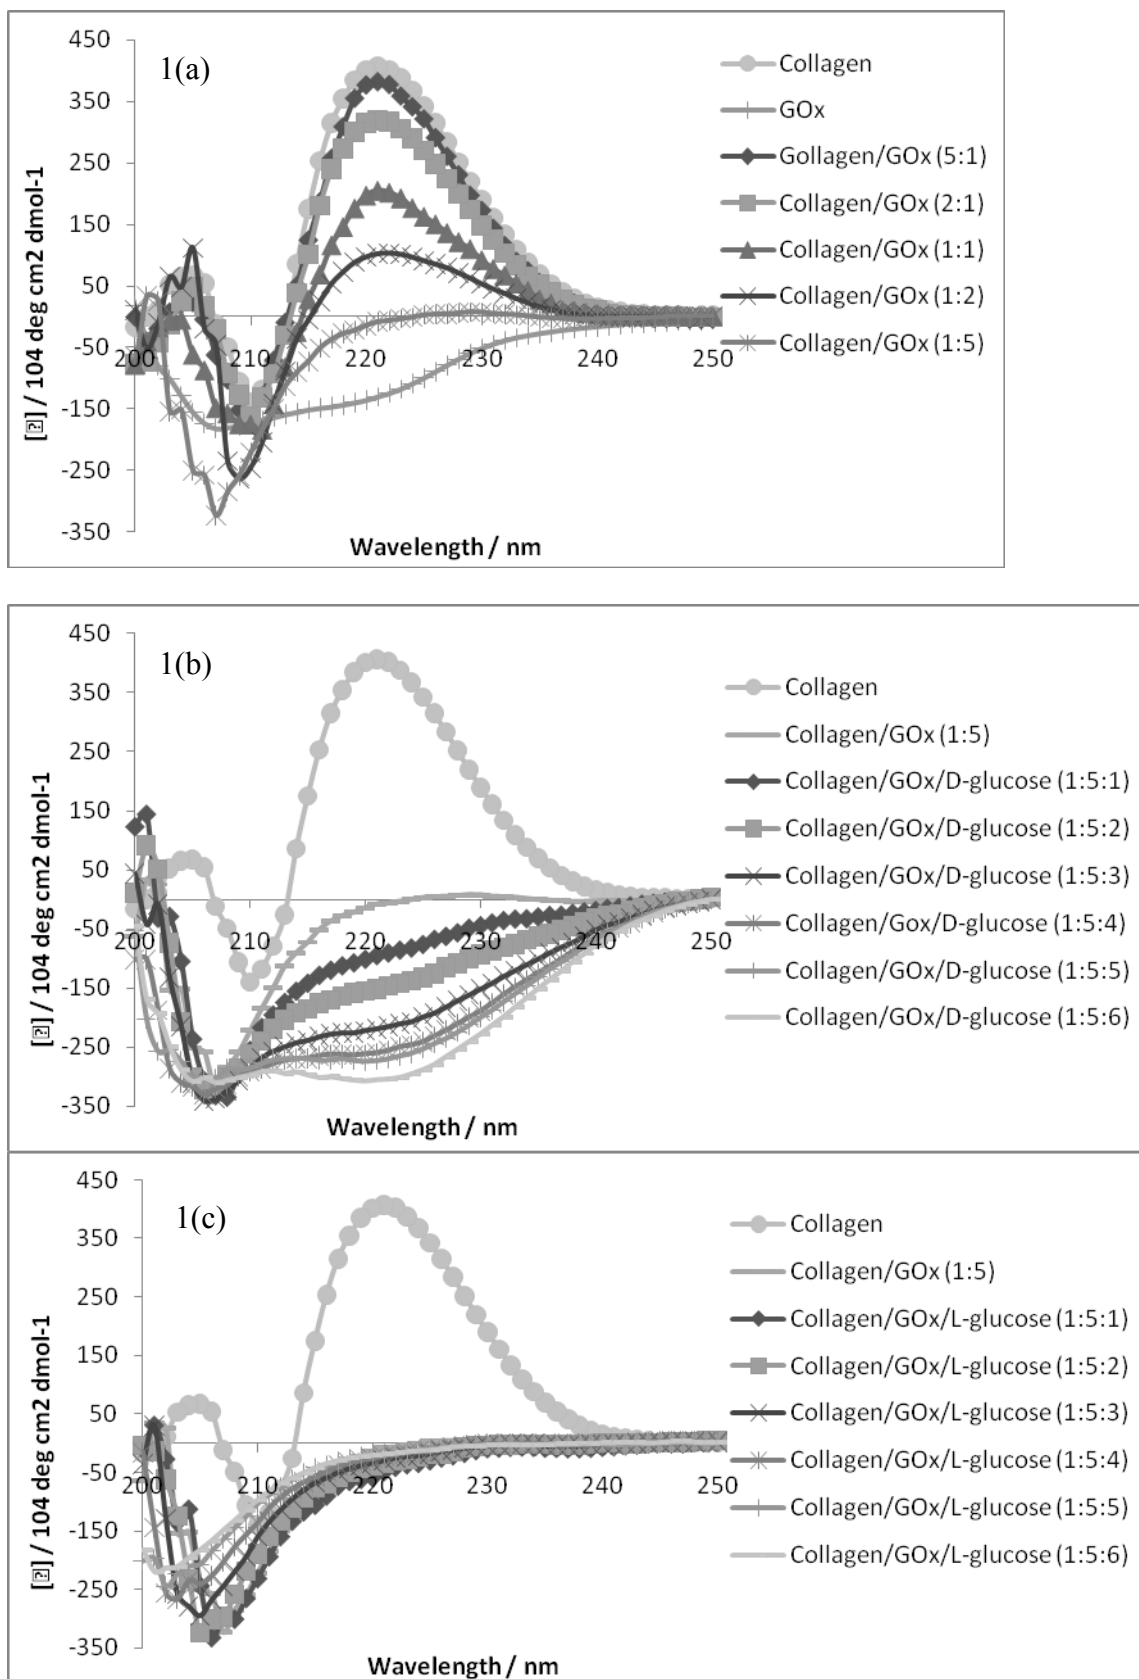

Figure 2: CD obtained from (a) stepwise addition LOx to collagen, (b) titration of D-lactate to Collagen/LOx (1:5) system, and (c) titration of L-lactate to Collagen/LOx (1:5) system.

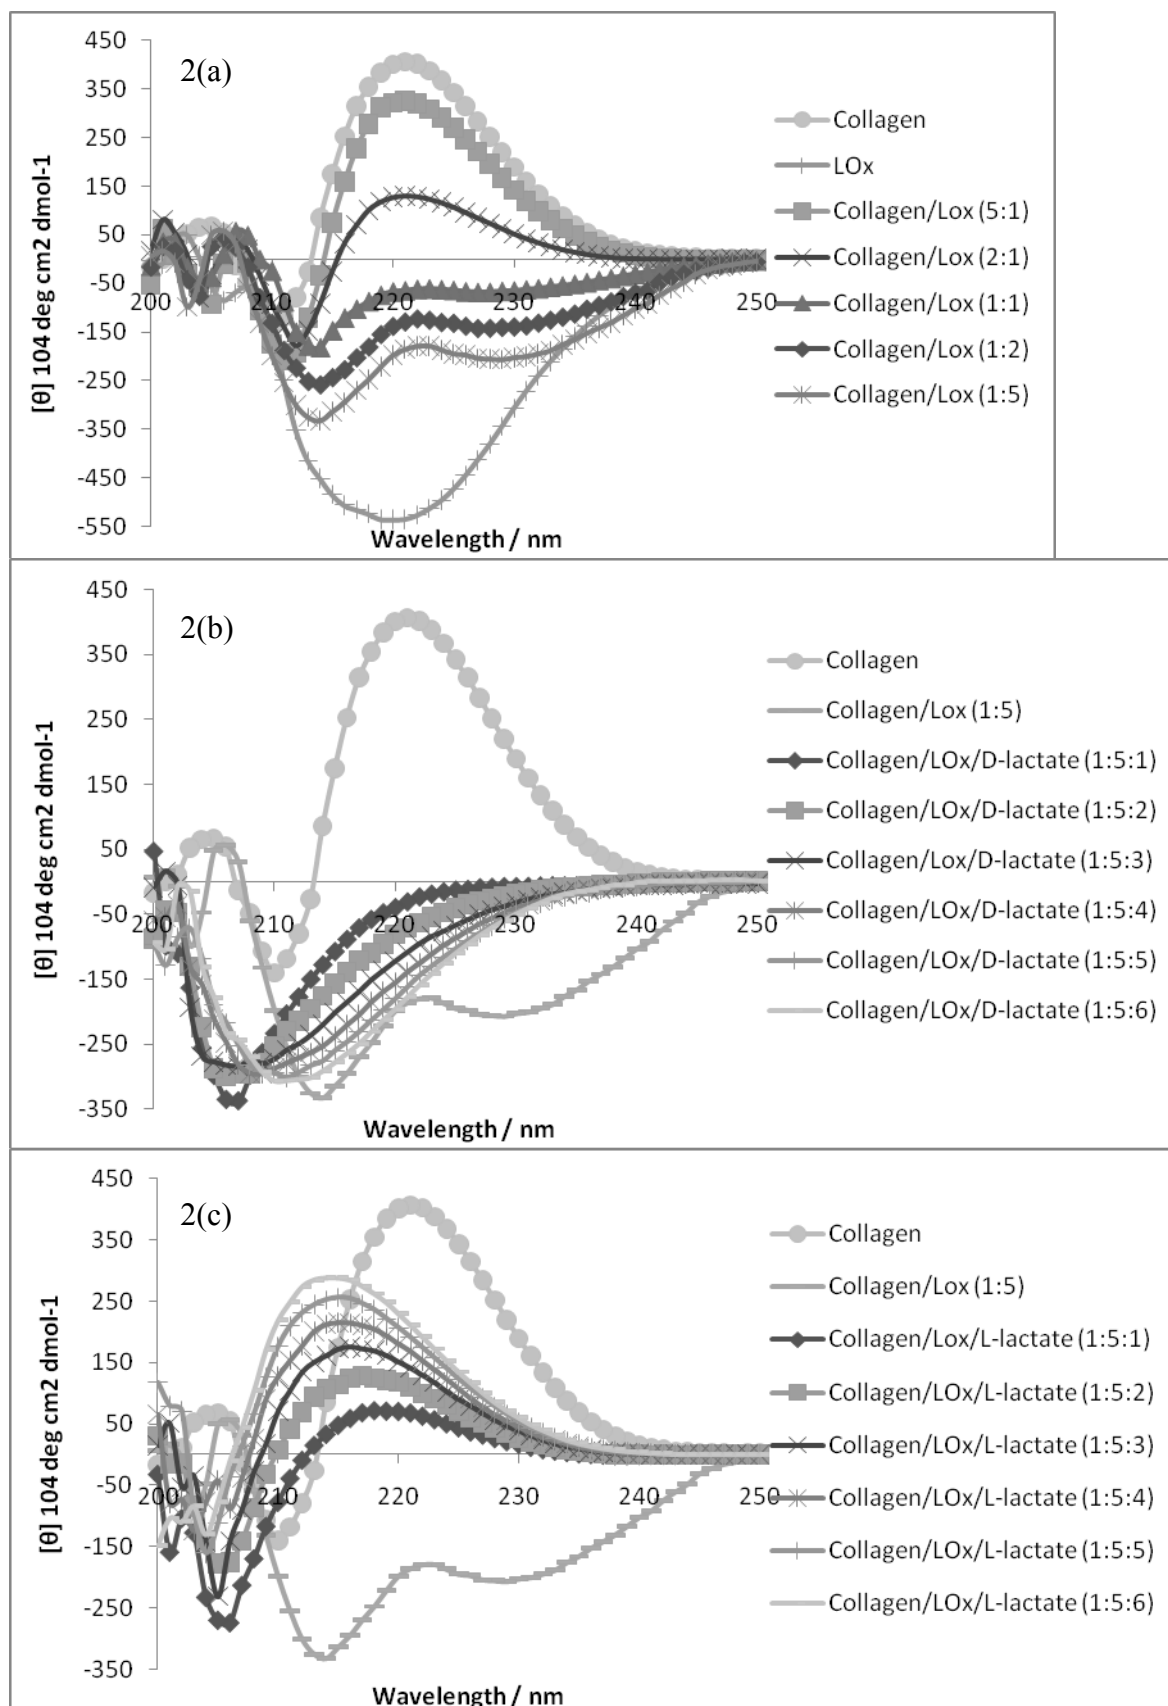

Figure 3: Deconvolution of the FTIR spectrums at Amide I band for (a) collagen, (b) collagen/GOx, (c) collagen/GOx/D-glucose, and (d) collagen/GOx/L-glucose systems. (1. Denatured collagen, 2. Triple helix, 3. Unordered structure, 4.  $\alpha$ -helix, 5. B-turns, 6. Anti-parallel  $\beta$ -sheets, 7. Parallel  $\beta$ -sheets, 8. Helices of aggregated collagen-like peptides).

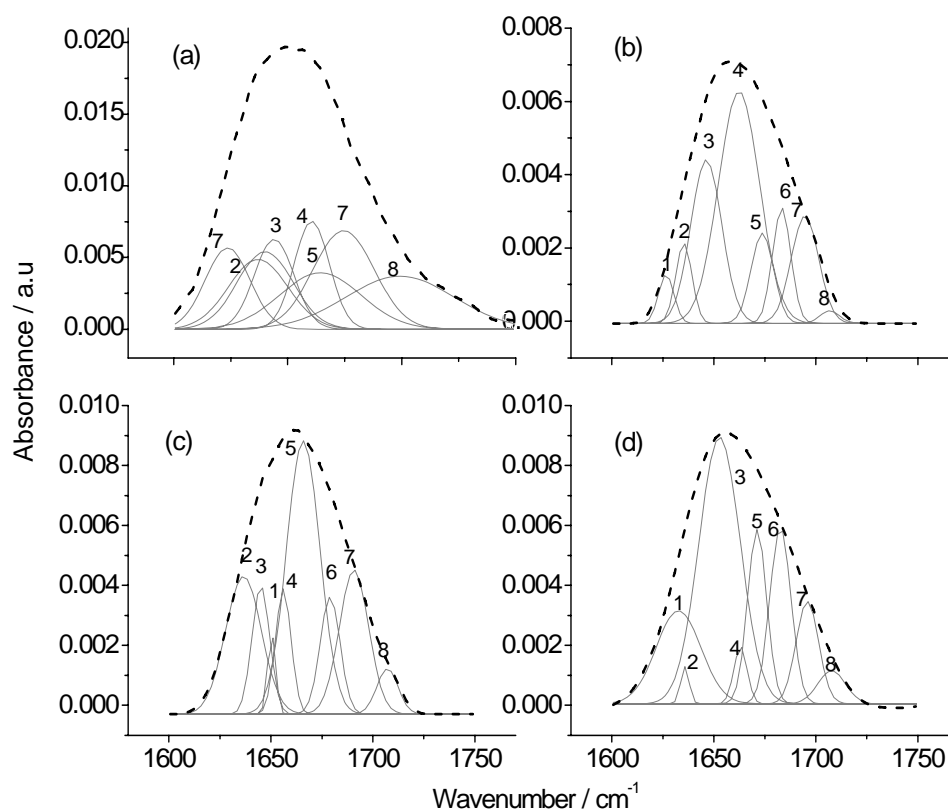

Supplement: c003933k.pdf [file c003933k.pdf]
